1           **Incorporating prior information into signal-detection**

2           **analyses across biologically informed gene-sets**

3

4   Mengqi Zhang<sup>1,2,3</sup>, Sahar Gelfman<sup>4</sup>, Janice McCarthy<sup>1</sup>, David B. Goldstein<sup>4</sup>, and

5   Andrew S. Allen<sup>1,2,3\*</sup>

6   1Department of Biostatistics and Bioinformatics, Duke University, Durham, North  
7   Carolina, 27710, United States of America;

8   2Center for Genomic and Computational Biology, Duke University, Durham, North  
9   Carolina, 27708, United States of America;

10   3Center for Statistical Genetics and Genomics, Duke University, Durham, North  
11   Carolina, 27710, United States of America;

12   4Institute of Genomic Medicine, Columbia University, New York City, New York, 10032,  
13   United States of America

14   **CORRESPONDING AUTHOR:** Andrew S. Allen

15   **EMAIL:** [andrew.s.allen@duke.edu](mailto:andrew.s.allen@duke.edu)

16

17

## 18 **ABSTRACT**

19 Signal detection analyses are used to assess whether there is any evidence of signal  
20 within a large collection of hypotheses. For example, we may wish to assess whether  
21 there is any evidence of association with disease among a set of biologically related  
22 genes. Such an analysis typically treats all genes within the sets similarly, even though  
23 there is substantial information concerning the likely importance of each gene within  
24 each set. For example, deleterious variants within genes that show evidence of purifying  
25 selection are more likely to substantially affect the phenotype than genes that are not  
26 under purifying selection, at least for traits that are themselves subject to purifying  
27 selection. Here we improve such analyses by incorporating prior information into a  
28 higher-criticism-based signal detection analysis. We show that when this prior  
29 information is predictive of whether a gene is associated with disease, our approach can  
30 lead to a significant increase in power. We illustrate our approach with a gene-set  
31 analysis of amyotrophic lateral sclerosis (ALS), which implicates a number of gene-sets  
32 containing *SOD1* and *NEK1* as well as showing enrichment of small  $p$ -values for gene-  
33 sets containing known ALS genes.

34

35 **Keywords:** Prior information, weighted  $p$ -values, Higher Criticism, gene set based  
36 analysis, amyotrophic lateral sclerosis

37

38

39

40

## 41 INTRODUCTION

42 High-throughput sequencing (HTS) studies, both whole exome studies (WES) and,  
43 more recently, whole genome studies (WGS), have emerged as the primary approach  
44 to identifying genetic variation that may be associated with disease. Unlike genome-  
45 wide association studies which depend on linkage disequilibrium between tag SNPs and  
46 pathogenic variation, WES and WGS studies are able to assay pathogenic variation  
47 directly, and as a result, are able to directly interrogate the role of rare variation in  
48 disease. When the disease phenotype impacts the fitness of an individual, variants with  
49 a large effect on the phenotype will tend to be rare, as they will tend to be pruned out of  
50 the population before reaching appreciable frequency by purifying selection. This has  
51 been seen empirically (Park et al., 2011), and rare-variant focused disease mapping  
52 studies have successfully implicated a number of newly discovered disease genes,  
53 including studies in predominantly later onset diseases such as amyotrophic lateral  
54 sclerosis (ALS, Poppe et al, 2014; Cirulli et al. 2015) and idiopathic pulmonary fibrosis  
55 (IPF, Palmer et al, 2018). As each individual variant is rare, single-variant analyses are  
56 likely underpowered for detecting disease association. Therefore, rare-variant analyses  
57 usually integrate the effects of many variants across a gene or other genetic region. In  
58 these analyses, variants are often filtered by surrogates of the variant's likely  
59 deleteriousness including the variant's frequency in the general population as well as  
60 annotations of the variant's likely functional impact on the ultimate protein product.  
61 Further, when such an analysis is restricted to rare variation, a gene that demonstrates  
62 an excess of deleterious variants in cases over controls provides strong evidence for

63 the direct involvement of that gene in disease etiology as any indirect effects such as  
64 linkage disequilibrium are minimized.

65

66 A primary goal of such studies is *signal identification*, i.e., identifying individual genes  
67 that show significant differences in the burden of qualifying variants between cases and  
68 controls. For example, in the whole exome ALS sequencing study (Gelfman et al. 2018),  
69 the exomes of 18536 genes were sequenced across 3093 ALS cases and 8186  
70 neurologically normal controls and tested for differences in the burden of rare variation,  
71 identifying *SOD1* [MIM: 147450], *NEK1*[MIM: 604588], and *TARDBP*[MIM:605078] as  
72 being involved in ALS (Gelfman et al. 2018). Though these findings are undoubtedly an  
73 advance for ALS genetics, there is likely signal in this dataset that is below the  
74 identification threshold and, thus, remains latent. Our goal here is to enhance our  
75 understanding of disease etiology by uncovering this latent signal.

76

77 An alternate to *signal identification* is *signal detection*, i.e., the detection of whether any  
78 genes within a set of genes participating in a biologic process show significant  
79 differences in the burden of qualifying variants between cases and controls. Signal  
80 detection does not attempt to identify which genes in the set are non-null, just that there  
81 exists some subset of the genes within the gene-set that show signal. As a result, the  
82 signal detection problem can be addressed by a goodness of fit test that assesses  
83 whether the distribution of  $p$ -values, for the individual gene-level tests within the gene-  
84 set, follow a uniform distribution (i.e., all tests in the gene-set are null). Rejecting such a  
85 test implies that at least some of the genes in the gene-set have differences in the

86 burden of qualifying variants between cases and controls. If the gene sets are chosen  
87 carefully, signal detection within the set can provide mechanistic insight into disease  
88 etiology, for example by emphasizing the importance of specific pathways or otherwise  
89 related gene sets. Higher Criticism (HC) is one such approach. Donoho and Jin  
90 (Donoho & Jin, 2004) showed that the HC statistic obtains the optimal detection limit for  
91 “rare-weak” alternatives where a small proportion of hypotheses weakly deviate from  
92 the null.

93

94 A limitation of such an approach is that it treats all genes within the focal gene-set  
95 equally, even though there is substantial external prior information about the relative  
96 importance of a gene within a gene-set. Genic intolerance (Petrovski et al, 2013),  
97 network centrality (Barabási & Albert, 1999; White & Smyth, 2003) and gene expression  
98 in disease relevant tissues are examples of sources of prior information that can be  
99 used to quantify the relative importance of genes within gene-sets. We discuss these  
100 sources of prior information in detail in the materials and methods section below.

101

102 Here we develop a novel HC statistic that incorporates prior information concerning the  
103 relative importance of genes within a gene-set into the analysis. We develop an  
104 asymptotic theory for the null distribution of our statistics and describe permutation  
105 procedures that can be used when the asymptotic approximation is likely to be poor. We  
106 conduct extensive simulation studies and show that when the prior information is  
107 correlated with those genes that are involved in disease our approach leads to a

108 substantial increase in power. We illustrate our approach with a gene-set analysis of a  
109 whole exome sequencing study of amyotrophic lateral sclerosis.

110

## 111 MATERIALS AND METHODS

### 112 Overview of our approach

113 We develop a self-contained gene-set test based on a higher criticism statistic that  
114 explicitly weights the contribution of each gene in the set by prior information reflecting a  
115 genes likelihood of being involved in disease pathology. The higher criticism statistic our  
116 approach is based on can be thought of as a goodness of fit test. Specifically, consider  
117 a set of  $n$  statistics,  $X_1, X_2, \dots, X_n$  and empirical distribution function  $\widehat{F}(x)$ . In our  
118 application, these statistics represent tests of gene/phenotype association for each of  
119 the  $n$  genes in a gene-set selected on the basis of biological relationships. The higher  
120 criticism test assesses whether the observed distribution,  $\widehat{F}(x)$ , is consistent with  $F_0(x)$ ,  
121 the distribution of the test statistics under the global null. In most cases, the statistics we  
122 are working with are the  $p$ -values associated with each gene in the set. Therefore, as  
123 these  $p$ -values will be uniform under the null, we have that  $F_0(x) = x$  and we could  
124 assess whether the observed distribution of  $p$ -values is consistent with the global null  
125 using the Kolomorgorov-Smirnov (KS) test statistic,

$$KS = \sup_x |\widehat{F}(x) - x|.$$

126 However, Donoho and Jin (2004) showed that the power to detect small shifts in the  
127 distribution function due to a small number of weak signals can be improved by scaling

128 the KS test by  $Var_{H_0}(\widehat{F}(x)) = F_0(x)(1 - F_0(x))/n = x(1 - x)/n$  and restricting the  
129 domain over which the supremum is taken to the tail. These modifications of the KS test  
130 give rise to the higher-criticism (HC) test,

$$HC = \sup_{x < \alpha} \left\{ \frac{|\widehat{F}(x) - x|}{x(1 - x)/n} \right\}.$$

131 *Incorporating prior information into higher-criticism statistics.* To incorporate prior  
132 information into the HC framework, we assume that for the  $i^{th}$  gene ( $i^{th}$  hypothesis  
133 being tested) there is affiliated a weight,  $w_i \geq 0$ , such that  $w_i$  quantifies the relative  
134 importance of a gene within the gene-set. Let  $w = (w_1, w_2, \dots, w_n)$ . Let  $x_i$  be  $i^{th}$  gene's  
135  $p$ -value and let  $x_i^* = w_i x_i$ . Define

$$HC^* = \sup_{x^* < \alpha} \left\{ \frac{|\widehat{F}(x^*) - F_0(x^*; w)|}{F_0(x^*; w)(1 - F_0(x^*; w))/n} \right\},$$

136 where  $\widehat{F}(x^*)$  is the empirical distribution function of the  $x^*$ s and  $F_0(x^*)$  is cumulative  
137 distribution function of  $x^*$  under the global null hypothesis. We can show that

$$138 \quad F_0(x^*; w) = \frac{1}{n} \sum_{i=1}^n \left[ I(x^* \geq w_i) + \frac{x^*}{w_i} I(x^* < w_i) \right].$$

139 It is not difficult to see that  $HC^*$  is of the same form as the unweighted HC statistic  
140 studied by (Jaeschke, 1979) which was shown to converge in distribution to the Gumbel  
141 distribution as  $n$  goes to infinity. However, as noted by Barrett and Lin (2014), this  
142 convergence is extremely slow and unlikely to yield a good approximation in most cases.  
143 As a result, we use permutation to approximate the null distribution of  $HC^*$ . When testing  
144 across a large number of gene-sets, we use the algorithm proposed by Ge, Dudoit, &  
145 Speed (2003) to account for testing multiple, potentially correlated, hypotheses.

146

## 147 **Choosing the weights**

148 The weights summarize prior information concerning the relative importance of a gene  
149 within a gene-set. We consider three main sources of this information: 1) Genic  
150 intolerance; 2) Network centrality; and 3) Gene expression in disease relevant tissues.

151  
152 *Genic Intolerance*. Genic Intolerance quantifies the amount of purifying selection  
153 affecting a gene relative to a genome-wide average. Specifically, using standing human  
154 variation in large, publicly available, databases such as gnomAD (Lek et al, 2016), the  
155 number of common functional variants within a gene is regressed against the total  
156 number of variants within that gene. The Residual Variance Intolerance Score (RVIS) is  
157 the gene-level residual from that regression (Petrovski, Wang, Heinzen, Allen, &  
158 Goldstein, 2013). Thus, if a gene has less functional variation than expected given the  
159 total amount of variation within the gene, it will have a negative RVIS score. If it has  
160 more functional variation than expected, it will tend to have a positive score. RVIS has  
161 been shown to be strongly predictive of Mendelian disease genes, especially those that  
162 lead to early-onset severe disease phenotypes (Petrovski, Wang, Heinzen, Allen, &  
163 Goldstein, 2013).

164  
165 Here, we calculate a gene's intolerance-based weight,  $w_{ri}$ , as the gene's intolerance  
166 percentile among all 18536 scored genes, scaled to be between 0 and 2. By rescaling,  
167 we ensure that those genes that have intolerance scores that are less than the mean,  
168 and hence are more likely to be important in disease etiology, are given more  
169 importance in the overall gene-set, by decreasing their p-values.



170

171 *Connectivity of genes within biologic gene sets.* Interactions between genes in a genetic  
172 gene set can be represented by a network. In such a representation, nodes denote  
173 genes and the edges connecting them represent gene-gene interactions. It is quite  
174 common in biologic networks for a few genes to have a much larger number of  
175 connections than other genes. These highly connected genes are referred to as "hub"  
176 genes, and it is reasonable to hypothesize that deleterious mutations within such genes  
177 might be more disruptive of the biologic process represented by the network than  
178 mutations falling within less connected, more distal, genes.

179

180 The connectivity of a node is captured in the graph theory concept of "centrality" (White  
181 & Smyth, 2003; Borgatti, 2005), which can be quantified in a number of ways. Here, we  
182 investigate 3 measures of network centrality: degree centrality (White & Smyth, 2003;  
183 Borgatti, 2005), Eigenvector centrality (Freeman, 1979; Stephenson and Zelen, 1989;  
184 Wasserman and Faust, 1994; White & Smyth, 2003) and PageRank centrality (Page et  
185 al, 1998, White & Smyth, 2003). Degree centrality is simply the number of edges from a  
186 given node, i.e., the number of genes that interact with a given gene. Eigenvector  
187 centrality of a node is a measure of the importance of the nodes it is connected to, i.e. a  
188 node is important if it is connected to other important nodes. (Freeman, 1979;  
189 Stephenson and Zelen, 1989; Wasserman and Faust, 1994; White & Smyth, 2003).  
190 PageRank centrality is defined by the pageRank algorithm used in web searches by  
191 Google (Page et al, 1998, White & Smyth, 2003). pageRank assumes that a web page  
192 (node) is more important if it receives more links (directed connections) from other high

193 pageRank scored web pages (Page et al, 1998, White & Smyth, 2003). Unlike degree  
194 centrality and eigenvector centrality, pageRank considers the directionality of the  
195 connection.

196

197 For a given centrality measure, Let  $c_i$  be the centrality for the  $i^{th}$  gene. In order to  
198 generate weights that result in smaller p-values for more highly connected genes, we  
199 take  $w_{ci} = \lambda(ac_i + b\bar{c})^{-1}$ , where  $\bar{c}$  is the mean centrality across the gene set,  $a$  and  $b$   
200 are user-defined constants (here we take  $a = 0.95$  and  $b = 0.05$ ), and  $\lambda$  is a scaling  
201 factor so that the mean of the weights is one.

202 .

203 *Gene expression in disease-related tissues.* Genes that are important in disease  
204 etiology are more likely to be expressed in disease-related tissues during the  
205 developmental period leading to the disease. Therefore, for the  $i^{th}$  gene we define a  
206 weight  $w_{ei} = \lambda(ae_i + b\bar{e})^{-1}$ , where  $e_i$  is the expression level (appropriately normalized)  
207 in a disease-related tissue,  $\bar{e}$  is the mean expression across all genes in the gene set,  $a$   
208 and  $b$  are user-defined constants (here we take  $a = 0.95$  and  $b = 0.05$ ), and  $\lambda$  is a  
209 scaling factor so that the mean of the weights is one.

210

## 211 **Simulation study**

212 We conduct a simple simulation study to evaluate the utility of our approach. For each  
213 scenario, we simulate  $1e+4$  datasets. For each simulated dataset we generate  $n$   
214 independent statistics  $X_i, i = 1, \dots, n$ , associated with  $n$  hypotheses. Let  $\pi$  be the  
215 proportion of the  $X_{iS}$  that are generated under the alternative. We assume  $X_i \sim N(\mu, 1)$

216 under the alternative and  $X_i \sim N(0,1)$  under the null. Thus, marginally,  $X_i \sim \pi N(\mu, 1) +$   
217  $(1 - \pi)N(0,1)$ . Note that  $\pi$  characterizes the sparsity of the alternatives among all the  
218 hypotheses tested while  $\mu$  controls the location shift from null to alternative. Thus, in our  
219 simulations, we evaluate the power of our approach as  $\pi$  and  $\mu$  vary and choose  
220 configurations that explore the detection boundary outlined by Donoho & Jin, 2014.  
221 Each  $X_i$  is converted to a p-value via  $p_i = \Phi(-|X_i|)$ . Weights are generated from a  
222 truncated exponential distribution and then scaled to have mean one. We consider three  
223 different scenarios: 1) weights are randomly assigned to genes; 2) weights are  
224 negatively correlated with disease-associated genes so that their p-values in the  $HC^*$   
225 statistic are decreased, increasing their influence on the statistic; and 3) weights are  
226 positively correlated with disease-associated genes so that these genes will have less  
227 influence on the  $HC^*$  statistic while the influence of genes that are not disease-  
228 associated will be increased. We generate a large number of simulated datasets under  
229 the global null (i.e.,  $\pi = 0$ ) and use these to calculate a rejection threshold for each  
230 scenario. Specifically, we take the top 5<sup>th</sup> percentile of  $HC$  and the  $HC^*$  statistics  
231 (corresponding to the weighting scenarios) calculated using the global null simulated  
232 datasets and use them as rejection thresholds for the corresponding statistics under the  
233 various alternative hypotheses. Please see supplementary materials for complete  
234 details.

235

### 236 **Amyotrophic lateral sclerosis whole exome study**

237 We illustrate our approach through an analysis of data from a whole exome sequencing  
238 study comprised of 3093 ALS patients and 8186 controls of European ancestry

239 (Gelfman et al, 2018). The sample information is available online (alsdb.org). The 18536  
240 genes were sequenced and captured with the standard approach of Gelfman et al, 2018.  
241 Gene-level qualifying variant collapsing analyses were conducted according to two  
242 definitions of qualifying variants (table 1). Specifically, for a given qualifying variant  
243 definition and a given gene, we create an indicator variable of whether a given subject  
244 has a qualifying variant in that gene. We then test for association between the presence  
245 of a qualifying variant in the gene and case-control status using the Cochran–Mantel–  
246 Haenszel test, where strata are defined by the stratification score (Epstein et al, 2007).  
247 This results in two p-values per gene (corresponding to two definitions of qualifying  
248 variant); we take the minimum of the two to get a single gene-level p-value.

249  
250 We analyzed 4436 candidate gene sets extracted from the hallmark, GO biological  
251 process collections (c5.bp, version 6.1, Subramanian et al., 2005, Liberzon et al.,  
252 2015). Gene sets containing less than 10 genes were not analyzed.

253  
254 We consider three different sources of prior information in developing gene-level  
255 weights: genetic networks from bioGRID (*BioGRID Version 3.4.147*, Stark et al., 2006,  
256 Chatranyamontri et al., 2017), genic intolerance (Petrovski, Wang, Heinzen, Allen, &  
257 Goldstein, 2013), and gene expression levels in disease-relevant tissue (brain) from  
258 GTex (GTEx Consortium, 2015). We used three different metrics for summarizing a  
259 genes importance within a genetic network: degree centrality (White & Smyth, 2003),  
260 eigenvector centrality (Freeman, 1979; Stephenson and Zelen, 1989; Wasserman and

261 Faust, 1994; White & Smyth, 2003), and pageRank centrality (Page et al, 1998, White &  
262 Smyth, 2003).

263

264 For each gene-set, we conducted both weighted (denoted by  $w$ ), using the weighting  
265 schemes highlighted above, and unweighted (denoted by  $u$ ) analyses. Since we are  
266 interested in whether gene set analyses can help uncover specific gene sets that  
267 disease genes participate in, we also removed two genes that were found to be  
268 significantly associated with ALS: *SOD1* (raw  $p$ -value: 4.1e-15, Bonferroni adjusted  $p$ -  
269 value: 7.6e-11) and *NEK1* (raw  $p$ -value: 6.74e-10, Bonferroni adjusted  $p$ -value: 1.25e-  
270 05) from the gene set analyses. These analyses are denoted by  $wr$  and  $ur$  for weighted  
271 and unweighted analyses, respectively.

272

273 We obtained empirical null distributions of our statistics by randomly permuting  
274 case/control status (each distribution was generated using 2e+6 permutations).  
275 Because genes may participate in multiple gene sets, leading to correlation between  
276 tests, we used the step-down minP algorithm (Box 4: Ge, Dudoit, & Speed, 2003) to  
277 obtain multiplicity adjusted  $p$ -values across all the gene sets analyzed.

278

## 279 **RESULTS**

### 280 **Simulation study.**

281 As expected, when the effect size,  $\mu$ , is fixed, power increases with an increasing  
282 proportion of non-null hypotheses,  $\pi$  (figure 1). Similarly, when  $\pi$  is fixed, power  
283 increases with  $\mu$ . More interestingly, we can see that weighting can substantially

284 increase the power of the HC analysis if the values of weights are negatively correlated  
285 with non-null hypotheses, i.e. the weights tend to make p-values affiliated with non-null  
286 hypotheses smaller, so that those hypotheses have more influence on the final HC  
287 statistics (orange dashed lines). Further, the power is very similar to an unweighted  
288 analysis (solid black lines) when the weights are uncorrelated, i.e., are random noise  
289 (blue lines). It is only when the weights are positively correlated with the non-null  
290 hypotheses, so that null hypothesis are given more influence on the HC statistic, that we  
291 see a substantial negative effect on power when using weighting (red dash lines).  
292 However, in real applications one would expect that most weighting schemes would be  
293 somewhat informative of which genes would be disease-related. Thus, these results  
294 suggest that there is little downside to weighting individual hypotheses in HC analyses.

295

#### 296 **ALS data analysis.**

297 We found that marginally associated genes, had a strong effect on all HC analyses  
298 (weighted or not). For example, all gene-sets containing *SOD1* (260) and *NEK1* (21) are  
299 significantly associated with ALS after multiplicity adjustment, regardless of the HC  
300 statistic used (table 2). GSEA (Subramanian et al., 2005) fails to detect any significant  
301 gene sets. To investigate whether there is residual signal in gene sets after the  
302 marginally significant genes are removed, we conducted gene set analyses that  
303 excluded *SOD1* and *NEK1* from inclusion in any gene set. This analysis did not detect  
304 any significant gene sets after multiplicity adjustment, regardless of the method used.

305

306 We then investigated whether there were enrichment differences between methods for  
307 gene sets involving 51 known ALS disease genes highlighted in Cirulli et al. 2015 (Table  
308 S1). The results of these analyses are presented in table 3 and one can see that  
309 weighting based on pageRank centralities performs well. Since many of these gene sets  
310 are likely devoid of any signal, we repeated this analysis while further restricting the  
311 gene sets considered to those where there was at least one gene-set analysis approach  
312 yielding a marginally significant result ( $p \leq 0.05$ ) (table 4). Once again, we find that  
313 pageRank centrality does well and that HC outperforms GSEA.

314

## 315 **DISCUSSION**

316 We have presented a new gene-set based analysis that incorporates prior information  
317 into the analysis using a higher criticism approach. In both simulation studies and real  
318 data analyses, we showed that such an approach can lead to higher power. However,  
319 the choice of weights is important and consideration should be made for what  
320 information is most likely to be predictive of truly associated disease genes. For  
321 example, in our p-value enrichment analyses of known ALS genes, we found little  
322 enrichment when we used genic intolerance measures as our weights. As genic  
323 intolerance is indicative of purifying selection, this choice of weights may be less  
324 informative in a late-onset disorder such as ALS. Results would likely be different for  
325 earlier-onset disorders such as autism spectrum disorder, epilepsy, or schizophrenia.  
326 Further applications across a spectrum of diseases are needed before general  
327 recommendations can be made with respect to weighting schemes.

328

329 The higher criticism analysis can be thought of as a goodness of fit test that focuses on  
330 extreme deviations (by taking a max) from expectation under a global null that none of  
331 the genes within the gene set are associated with the disease. Though this approach  
332 has been shown to be optimal in detecting sparse signals within a large collection of  
333 hypotheses, it may be less sensitive to detecting signal that is more diffuse. In such a  
334 case, there may be an advantage in integrating over the tail of the distribution of  
335 deviations rather than taking a max. We are currently investigating this approach and  
336 plan to highlight it in a future manuscript.

337

338

### 339 **DESCRIPTION OF SUPPLEMENTAL DATA**

340 Supplemental Data include two tables and 4 series of figures. Table S1 lists the ALS-  
341 related genes according to Cirulli et al, 2015. Table S2 describes the simulation  
342 procedure. The text describes profiling details in the simulation study. The 4 series of  
343 figures provides the complete results of the simulation under various condition settings.

344

345

### 346 **ACKNOWLEDGEMENTS**

347 We thank Chong Jin from University of North Carolina at Chapel Hill and Dr. Zhiguo Li  
348 from Duke University, for suggestions on the asymptotic distribution of Higher Criticism  
349 based on the  $p$ -values and weighted  $p$ -values under the null hypothesis.

350

351



## 352 **DECLARATION OF INTERESTS**

353 Andrew S. Allen and David B. Goldstein received research support from AstraZeneca,  
354 Inc. The remaining authors declare no competing interests.

355

## 356 **WEB RESOURCES**

357 An R package implementing the approach is available at  
358 <https://github.com/mqzhanglab/wHC>

359

360

## 361 **REFERENCES**

362 Adzhubei, I. A., Schmidt, S., Peshkin, L., Ramensky, V. E., Gerasimova, A., Bork, P., ...

363 Sunyaev, S. R. (2010). A method and server for predicting damaging missense  
364 mutations. *Nature Methods*, 7(4), 248–249. <https://doi.org/10.1038/nmeth0410-248>

365 Al-Chalabi, A., Fang, F., Hanby, M. F., Leigh, P. N., Shaw, C. E., Ye, W., & Rijdsdijk, F.  
366 (2010). An estimate of amyotrophic lateral sclerosis heritability using twin data.  
367 *Journal of Neurology, Neurosurgery & Psychiatry*, 81(12), 1324–1326.  
368 <https://doi.org/10.1136/jnnp.2010.207464>

369 Andersen, P. M., Borasio, G. D., Dengler, R., Hardiman, O., Kollewe, K., Leigh, P. N.,  
370 ... Tomik, B. (2007). Good practice in the management of amyotrophic lateral  
371 sclerosis: Clinical guidelines. An evidence-based review with good practice points.  
372 *EALSC Working Group. Amyotrophic Lateral Sclerosis*, 8(4), 195–213.  
373 <https://doi.org/10.1080/17482960701262376>

- 374 Bapat, R. B., & Beg, M. I. (1989). Order Statistics for Nonidentically Distributed  
375 Variables and Permanents. *Sankhyā: The Indian Journal of Statistics, Series A*  
376 (1961-2002), 51(1), 79–93.
- 377 Barabási, A.-L., & Albert, R. (1999). Emergence of Scaling in Random Networks.  
378 *Science*, 286(5439), 509–512. <https://doi.org/10.1126/science.286.5439.509>
- 379 Barnett, I. J., & Lin, X. (2014). Analytic P-value calculation for the higher criticism test in  
380 finite d problems. *Biometrika*, 101(4), 964–970.  
381 <https://doi.org/10.1093/biomet/asu033>
- 382 Barnett, I., Mukherjee, R., & Lin, X. (2017). The Generalized Higher Criticism for Testing  
383 SNP-Set Effects in Genetic Association Studies. *Journal of the American Statistical*  
384 *Association*, 112(517), 64–76. <https://doi.org/10.1080/01621459.2016.1192039>
- 385 Benjamini, Y., & Hochberg, Y. (1995). Controlling the False Discovery Rate: A Practical  
386 and Powerful Approach to Multiple Testing. *Journal of the Royal Statistical Society.*  
387 *Series B (Methodological)*, 57(1), 289–300.
- 388 Borgatti, S. P. (2005). Centrality and network flow. *Social Networks*, 27(1), 55–71.  
389 <https://doi.org/10.1016/j.socnet.2004.11.008>
- 390 Boyle, E. A., Li, Y. I., & Pritchard, J. K. (2017). An Expanded View of Complex Traits:  
391 From Polygenic to Omnigenic. *Cell*, 169(7), 1177–1186.  
392 <https://doi.org/10.1016/j.cell.2017.05.038>
- 393 Brenner, D., Müller, K., Wieland, T., Weydt, P., Böhm, S., Lulé, D., ... Weishaupt, J. H.  
394 (2016). NEK1 mutations in familial amyotrophic lateral sclerosis. *Brain*, 139(5),  
395 e28–e28. <https://doi.org/10.1093/brain/aww033>

- 396 Chatr-aryamontri, A., Oughtred, R., Boucher, L., Rust, J., Chang, C., Kolas, N. K., ...  
397 Tyers, M. (2017). The BioGRID interaction database: 2017 update. *Nucleic Acids*  
398 *Research*, 45(Database issue), D369–D379. <https://doi.org/10.1093/nar/gkw1102>
- 399 Cirulli, E. T., Lasseigne, B. N., Petrovski, S., Sapp, P. C., Dion, P. A., Leblond, C. S., ...  
400 Goldstein, D. B. (2015). Exome sequencing in amyotrophic lateral sclerosis  
401 identifies risk genes and pathways. *Science*, 347(6229), 1436–1441.  
402 <https://doi.org/10.1126/science.aaa3650>
- 403 Donoho, D., & Jin, J. (2004). Higher Criticism for Detecting Sparse Heterogeneous  
404 Mixtures. *The Annals of Statistics*, 32(3), 962–994. Download. (n.d.). Retrieved  
405 December 27, 2018, from <http://alsdb.org/download.jsp>
- 406 Epstein, M. P., Allen, A. S., & Satten, G. A. (2007). A Simple and Improved Correction  
407 for Population Stratification in Case-Control Studies. *The American Journal of*  
408 *Human Genetics*, 80(5), 921–930. <https://doi.org/10.1086/516842>
- 409 Freeman, L. C., Roeder, D., & Mulholland, R. R. (1979). Centrality in social networks: ii.  
410 experimental results. *Social Networks*, 2(2), 119–141. [https://doi.org/10.1016/0378-](https://doi.org/10.1016/0378-8733(79)90002-9)  
411 [8733\(79\)90002-9](https://doi.org/10.1016/0378-8733(79)90002-9)
- 412 Ge, Y., Dudoit, S., & Speed, T. P. (2003). Resampling-based multiple testing for  
413 microarray data analysis. *Test*, 12(1), 1–77. <https://doi.org/10.1007/BF02595811>
- 414 Gelfman, S., Dugger, S. A., Moreno, C. A. M., Ren, Z., Wolock, C. J., Shneider, N. A.,  
415 ... Goldstein, D. B. (2018). Regional collapsing of rare variation implicates specific  
416 genic regions in ALS. *BioRxiv*, 375774. <https://doi.org/10.1101/375774>
- 417 Genovese, C. R., Roeder, K., & Wasserman, L. (2006). False Discovery Control with p-  
418 Value Weighting. *Biometrika*, 93(3), 509–524.

- 419 Goh, K.-I., Cusick, M. E., Valle, D., Childs, B., Vidal, M., & Barabási, A.-L. (2007). The  
420 human disease network. *Proceedings of the National Academy of Sciences*,  
421 104(21), 8685–8690.
- 422 Hall, P., & Jin, J. (2010). Innovated higher criticism for detecting sparse signals in  
423 correlated noise. *The Annals of Statistics*, 38(3), 1686–1732.  
424 <https://doi.org/10.1214/09-AOS764>
- 425 Kabashi, E., Valdmanis, P. N., Dion, P., Spiegelman, D., McConkey, B. J., Velde, C. V.,  
426 ... Rouleau, G. A. (2008). TARDBP mutations in individuals with sporadic and  
427 familial amyotrophic lateral sclerosis. *Nature Genetics*, 40(5), 572–574.  
428 <https://doi.org/10.1038/ng.132>
- 429 Kircher, M., Witten, D. M., Jain, P., O’Roak, B. J., Cooper, G. M., & Shendure, J. (2014).  
430 A general framework for estimating the relative pathogenicity of human genetic  
431 variants. *Nature Genetics*, 46(3), 310–315. <https://doi.org/10.1038/ng.2892>
- 432 Kosorok, M. R. (2008). *Introduction to empirical processes and semiparametric*  
433 *inference*. New York: Springer.
- 434 Lek, M., Karczewski, K. J., Minikel, E. V., Samocha, K. E., Banks, E., Fennell, T., ...  
435 Exome Aggregation Consortium. (2016). Analysis of protein-coding genetic  
436 variation in 60,706 humans. *Nature*, 536(7616), 285–291.  
437 <https://doi.org/10.1038/nature19057>
- 438 Liberzon, A., Birger, C., Thorvaldsdóttir, H., Ghandi, M., Mesirov, J. P., & Tamayo, P.  
439 (2015). The Molecular Signatures Database Hallmark Gene Set Collection. *Cell*  
440 *Systems*, 1(6), 417–425. <https://doi.org/10.1016/j.cels.2015.12.004>

- 441 Liberzon, A., Subramanian, A., Pinchback, R., Thorvaldsdóttir, H., Tamayo, P., &  
442 Mesirov, J. P. (2011). Molecular signatures database (MSigDB) 3.0. *Bioinformatics*,  
443 27(12), 1739–1740. <https://doi.org/10.1093/bioinformatics/btr260>
- 444 Lowe, D. G. (1999). Object recognition from local scale-invariant features. In  
445 Proceedings of the Seventh IEEE International Conference on Computer Vision  
446 (Vol. 2, pp. 1150–1157 vol.2). <https://doi.org/10.1109/ICCV.1999.790410>
- 447 Mann, H. B., & Wald, A. (1943). On Stochastic Limit and Order Relationships. *The*  
448 *Annals of Mathematical Statistics*, 14(3), 217–226.
- 449 Mooney, M. A., Nigg, J. T., McWeeney, S. K., & Wilmot, B. (2014). Functional and  
450 genomic context in pathway analysis of GWAS data. *Trends in Genetics*, 30(9),  
451 390–400. <https://doi.org/10.1016/j.tig.2014.07.004>
- 452 OMIM - Online Mendelian Inheritance in Man. (n.d.). Retrieved December 17, 2018,  
453 from <https://www.omim.org/>
- 454 Page, L., Brin, S., Motwani, R., & Winograd, T. (1999). The PageRank citation ranking:  
455 Bringing order to the web. Stanford InfoLab. Retrieved from  
456 <http://ilpubs.stanford.edu:8090/422>
- 457 Palmer, S.M., Snyder, L., Todd, J.L., Soule, B., Christian, R., Anstrom, K., Luo, Y.,  
458 Gagnon, R., and Rosen, G. (2018). Randomized, Double-Blind, Placebo-  
459 Controlled, Phase 2 Trial of BMS-986020, a Lysophosphatidic Acid Receptor  
460 Antagonist for the Treatment of Idiopathic Pulmonary Fibrosis. *Chest* 154, 1061–  
461 1069.
- 462 Park, J.-H., Gail, M.H., Weinberg, C.R., Carroll, R.J., Chung, C.C., Wang, Z., Chanock,  
463 S.J., Fraumeni, J.F., and Chatterjee, N. (2011). Distribution of allele frequencies

464 and effect sizes and their interrelationships for common genetic susceptibility  
465 variants. *Proceedings of the National Academy of Sciences* 108, 18026–18031.  
466  
467 Petrovski, S., Todd, J. L., Durheim, M. T., Wang, Q., Chien, J. W., Kelly, F. L., ...  
468 Goldstein, D. B. (2017). An Exome Sequencing Study to Assess the Role of Rare  
469 Genetic Variation in Pulmonary Fibrosis. *American Journal of Respiratory and*  
470 *Critical Care Medicine*, 196(1), 82–93. [https://doi.org/10.1164/rccm.201610-](https://doi.org/10.1164/rccm.201610-2088OC)  
471 2088OC  
472 Petrovski, S., Wang, Q., Heinzen, E. L., Allen, A. S., & Goldstein, D. B. (2013). Genic  
473 Intolerance to Functional Variation and the Interpretation of Personal Genomes.  
474 *PLOS Genetics*, 9(8), e1003709. <https://doi.org/10.1371/journal.pgen.1003709>  
475 Poppe, L., Rué, L., Robberecht, W., & Van Den Bosch, L. (2014). Translating biological  
476 findings into new treatment strategies for amyotrophic lateral sclerosis (ALS).  
477 *Experimental Neurology*, 262, 138–151.  
478 <https://doi.org/10.1016/j.expneurol.2014.07.001>  
479 Rao, J. S., & Sethuraman, J. (1975). Weak Convergence of Empirical Distribution  
480 Functions of Random Variables Subject to Perturbations and Scale Factors. *The*  
481 *Annals of Statistics*, 3(2), 299–313.  
482 Renton, A. E., Chiò, A., & Traynor, B. J. (2014). State of play in amyotrophic lateral  
483 sclerosis genetics. *Nature Neuroscience*, 17(1), 17–23.  
484 <https://doi.org/10.1038/nn.3584>

- 485 Roeder, K., & Wasserman, L. (2009). Genome-Wide Significance Levels and Weighted  
486 Hypothesis Testing. *Statistical Science: A Review Journal of the Institute of*  
487 *Mathematical Statistics*, 24(4), 398–413. <https://doi.org/10.1214/09-STS289>
- 488 Rosen, D. R., Siddique, T., Patterson, D., Figlewicz, D. A., Sapp, P., Hentati, A., ...  
489 Brown Jr, R. H. (1993). Mutations in Cu/Zn superoxide dismutase gene are  
490 associated with familial amyotrophic lateral sclerosis. *Nature*, 362(6415), 59–62.  
491 <https://doi.org/10.1038/362059a0>
- 492 Stark, C., Breitkreutz, B.-J., Reguly, T., Boucher, L., Breitkreutz, A., & Tyers, M. (2006).  
493 BioGRID: a general repository for interaction datasets. *Nucleic Acids Research*,  
494 34(Database issue), D535–D539. <https://doi.org/10.1093/nar/gkj109>
- 495 Stephenson, K., & Zelen, M. (1989). Rethinking centrality: Methods and examples.  
496 *Social Networks*, 11(1), 1–37. [https://doi.org/10.1016/0378-8733\(89\)90016-6](https://doi.org/10.1016/0378-8733(89)90016-6)
- 497 Storey, J. D. (2003). The Positive False Discovery Rate: A Bayesian Interpretation and  
498 the q-Value. *The Annals of Statistics*, 31(6), 2013–2035.
- 499 Subramanian, A., Tamayo, P., Mootha, V. K., Mukherjee, S., Ebert, B. L., Gillette, M. A.,  
500 ... Mesirov, J. P. (2005). Gene set enrichment analysis: A knowledge-based  
501 approach for interpreting genome-wide expression profiles. *Proceedings of the*  
502 *National Academy of Sciences*, 102(43), 15545–15550.  
503 <https://doi.org/10.1073/pnas.0506580102>
- 504 Wang, K., Li, M., & Bucan, M. (2007). Pathway-Based Approaches for Analysis of  
505 Genomewide Association Studies. *The American Journal of Human Genetics*,  
506 81(6), 1278–1283. <https://doi.org/10.1086/522374>

507 Wasserman, S., & Faust, K. (1994). Social Network Analysis: Methods and  
508 Applications. Cambridge University Press.

509 White, S., & Smyth, P. (2003). Algorithms for Estimating Relative Importance in  
510 Networks. In Proceedings of the Ninth ACM SIGKDD International Conference on  
511 Knowledge Discovery and Data Mining (pp. 266–275). New York, NY, USA: ACM.  
512 <https://doi.org/10.1145/956750.956782>

513

514

515

516

517

518

519

520

521

522

523

524

525

526

527

528

529



530 **FIGURE TITLES AND LEGENDS**

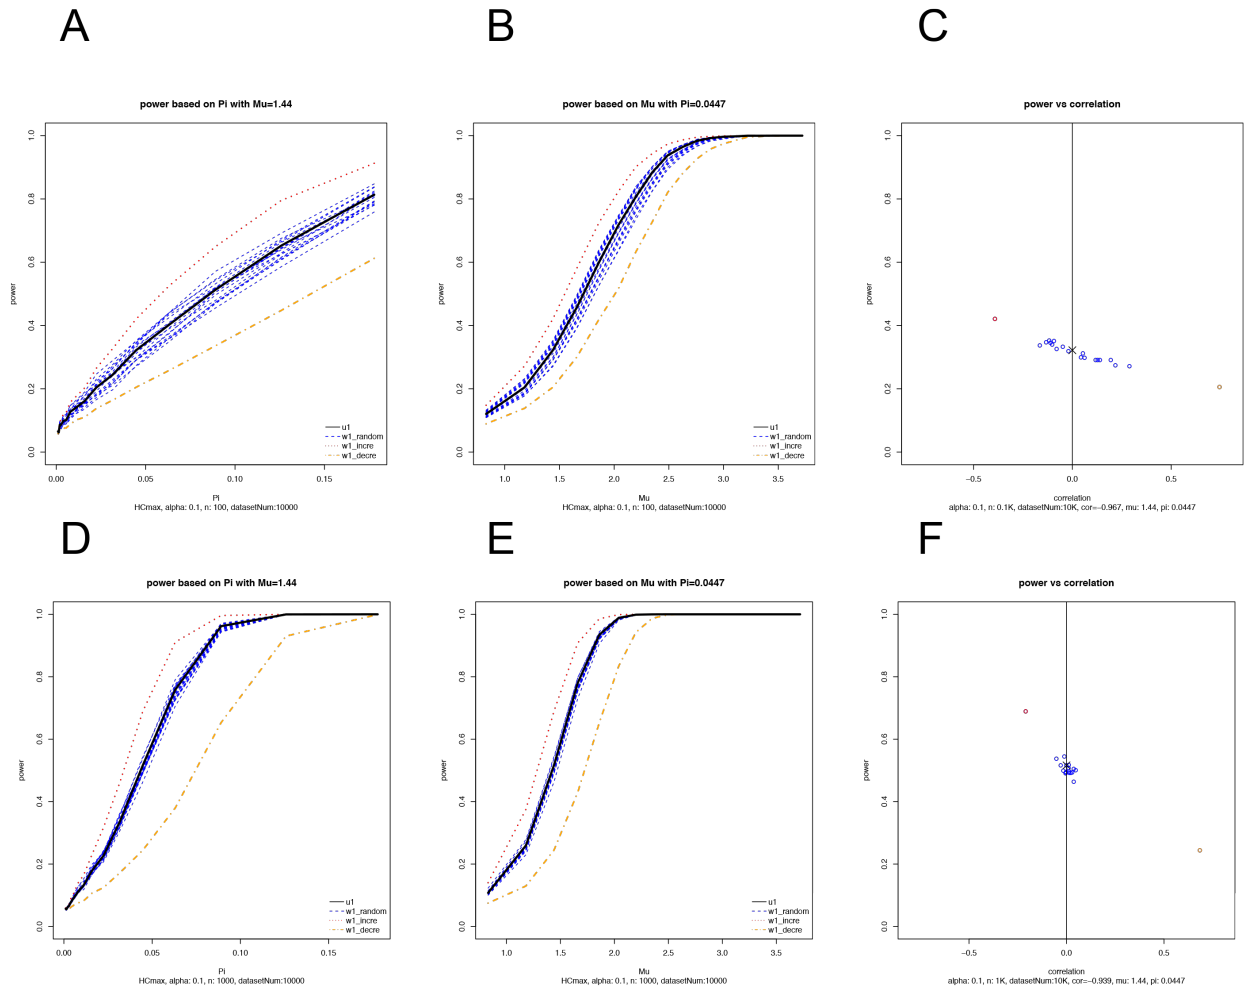

531

532

**Figure 1 Selected Theoretical Simulation Results**

533

Figure 1 shows the selected simulation results of the power of weighted HC ( $\mu=1.44$ ,  $\pi=0.447$ ). The black lines

534

(points) represent HC with no weights, the blue dashed lines(points) represent HC with uncorrelated weights.

535

The red dashed lines (points) represent HC with weights that negatively correlated with non-null hypotheses

536

(favors the alternative). The orange dashed lines (points) represent HC with weights that negatively

537

correlated with non-null hypotheses (favors the null). 1a) gene set size:100, Fixed  $\mu$ . 1b) gene set size:100,

538

Fixed  $\pi$ . 1c) gene set size:100. power vs. correlations between weights and non-null hypothesis. 1d) gene

539

set size:1000, Fixed  $\mu$ . 1e) gene set size:1000, Fixed  $\pi$ . 1f) gene set size:1000. power vs. correlations

540

between weights and non-null hypothesis. See support information for more results.

541 **TABLE TITLES AND LEGENDS**

542

543

544 Table 1. Different Genetic Models and qualifying criteria

545 (MAF=Minor Allele Frequency, LoF=Loss-of-function variants, Dom=dominant)

| Model                            | type | LOO MAF | ExAC MAF | Qualifying Variant Effect Criteria                     |
|----------------------------------|------|---------|----------|--------------------------------------------------------|
| <b>Damaging rare</b><br>(coding) | Dom  | 0.05%   | 0.01%    | LoF, inframe indels and PolyPhen-2 (HumDiv) "probably" |
| <b>LoF</b>                       | Dom  | 0.1%    | 0.1%     | LoF                                                    |

546

547

548

549

550 Table 2. The number of significant gene sets by method

551 (wHC=weighted HC, u=unweighted, w=weighted, GI=genic intolerance, Deg=Degree, Exp=Expression  
552 level,

553 Eigen= eigenvector centrality, PR = pageRank centrality)

| Gene sets with | Total | Significance in HC (u) or wHC(GI, Exp, Deg, Eigen or PR) | Significance in GSEA(u or w) |
|----------------|-------|----------------------------------------------------------|------------------------------|
| <b>SOD1</b>    | 260   | 260                                                      | 0                            |
| <b>NEK1</b>    | 21    | 21                                                       | 0                            |

554

555

556

557

558

559

560 Table 3. Method Comparison on ALS-related gene sets (Total gene sets: 899)

561 (wHC=weighted HC, u=unweighted, w=weighted, GI=genic intolerance, Exp=expression level in brain,  
562 Deg=Degree, Eigen= eigenvector centrality, PR = pageRank centrality)

| Method 1   | Method 2 | Numbers of <i>p</i> -values Method 1<=Method 2 | Numbers of <i>p</i> -values Method 1>=Method 2 | <i>p</i> -values for Method 1 better than Method 2 |
|------------|----------|------------------------------------------------|------------------------------------------------|----------------------------------------------------|
| wHC(GI)    | HC(u)    | 468                                            | 432                                            | 1.22e-1                                            |
| wHC(Exp)   | HC(u)    | 397                                            | 503                                            | 1.00e-0                                            |
| wHC(Deg)   | HC(u)    | 490                                            | 409                                            | 3.80e-3                                            |
| wHC(Eigen) | HC(u)    | 440                                            | 460                                            | 7.58e-1                                            |
| wHC(PR)    | HC(u)    | 501                                            | 398                                            | 3.31e-4                                            |
| HC(u)      | GSEA(u)  | 451                                            | 448                                            | 4.73e-1                                            |
| HC(u)      | GSEA(w)  | 436                                            | 463                                            | 8.25e-1                                            |

563

564

565

566 Table 4. Method Comparison on core ALS-related gene sets (Total gene sets: 186)

567 (wHC=weighted HC, u=unweighted, w=weighted, GI=genic intolerance, Exp=expression level in brain,  
568 Deg=Degree, Eigen= eigenvector centrality, PR = pageRank centrality)

| Method 1   | Method 2 | Numbers of <i>p</i> -values Method 1<=Method 2 | Numbers of <i>p</i> -values Method 1>=Method 2 | <i>p</i> -values for Method 1 better than Method 2 |
|------------|----------|------------------------------------------------|------------------------------------------------|----------------------------------------------------|
| wHC(GI)    | HC(u)    | 89                                             | 98                                             | 7.68e-1                                            |
| wHC(Exp)   | HC(u)    | 76                                             | 111                                            | 9.96e-1                                            |
| wHC(Deg)   | HC(u)    | 116                                            | 70                                             | 4.59e-4                                            |
| wHC(Eigen) | HC(u)    | 89                                             | 98                                             | 7.68e-1                                            |
| wHC(PR)    | HC(u)    | 123                                            | 64                                             | 9.57e-6                                            |
| HC(u)      | GSEA(u)  | 161                                            | 25                                             | 7.83e-26                                           |
| HC(u)      | GSEA(w)  | 158                                            | 28                                             | 1.67e-23                                           |

569

570
